# Supplementary material for: Bismuth ferrite: an abnormal perovskite with electrochemical extraction of ions from A site
Source: Royal Society of Chemistry journal article supplement (doi:10.1039/c9ta02569c), 2019-01-01
Supplement: c9ta02569c1.pdf [file c9ta02569c1.pdf]

## Supporting Information

### **Bismuth ferrite: an abnormal perovskite with electrochemical extraction of ions from A site**

Chao-Jie Ma,<sup>a,b,d,†</sup> Ya Chen,<sup>a,b,d,†</sup> Cheng Zhu,<sup>d</sup> Qi Chen,<sup>d</sup> Wei-Li Song,<sup>a,b,\*</sup> Shuqiang Jiao,<sup>c,\*</sup> Haosen Chen,<sup>a,b,e,\*</sup> Daining Fang<sup>a,b</sup>

<sup>a</sup>*Institute of Advanced Structure Technology, Beijing Institute of Technology, Beijing 100081, China.*

<sup>b</sup>*Beijing Key Laboratory of Lightweight Multi-functional Composite Materials and Structures, Beijing Institute of Technology, Beijing 100081, China.*

<sup>c</sup>*State Key Laboratory of Advanced Metallurgy, University of Science and Technology Beijing, Beijing 100083, China.*

<sup>d</sup>*School of Materials Science and Engineering, Beijing Institute of Technology, Beijing 100081, China.*

<sup>e</sup>*Collaborative Innovation Center of Electric Vehicles in Beijing, Beijing Institute of Technology, Beijing 100081, China.*

† These authors contributed equally.

### **Corresponding authors:**

**E-mails:** [weilis@bit.edu.cn](mailto:weilis@bit.edu.cn) (W. L. Song), [chenhs@bit.edu.cn](mailto:chenhs@bit.edu.cn) (H. Chen), [sjiao@ustb.edu.cn](mailto:sjiao@ustb.edu.cn) (S. Jiao).

**Full electrochemical processes:**

Extracted  $\text{Bi}^{3+}$  reaction process:

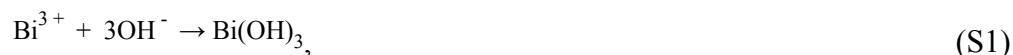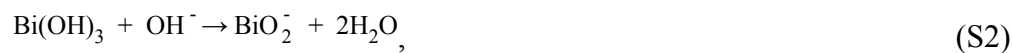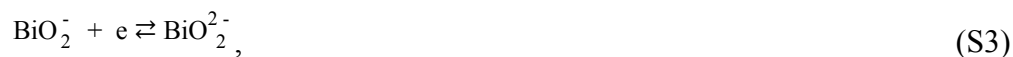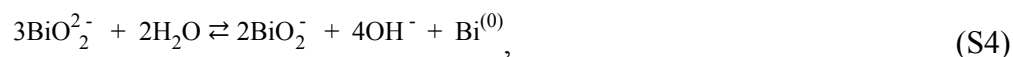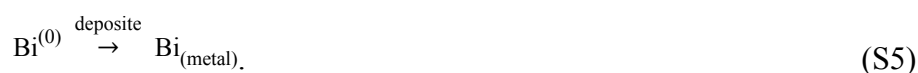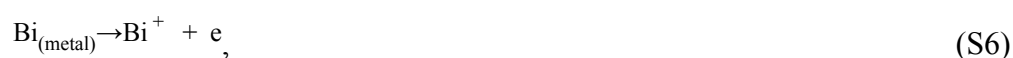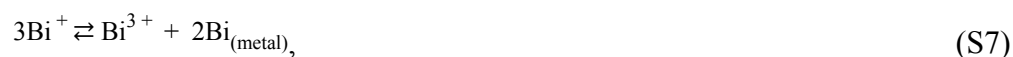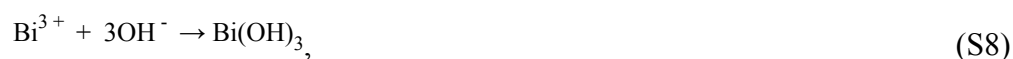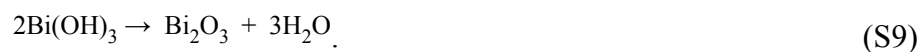

Iron oxide reaction process:

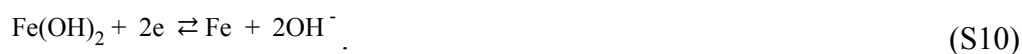

Iron was found to disappear in the following scanning cycles, which should refer to the high concentration of  $\text{OH}^-$  and thus the production of iron was substantially suppressed. Alternatively, the major redox reaction based on Fe ions would be assigned as  $\text{Fe}^{3+} \rightleftharpoons \text{Fe}^{2+}$  and the corresponding redox reaction in the following cycles is expected to be described as<sup>1,2</sup>

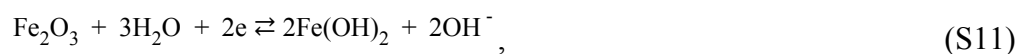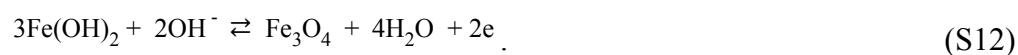

## DFT calculations

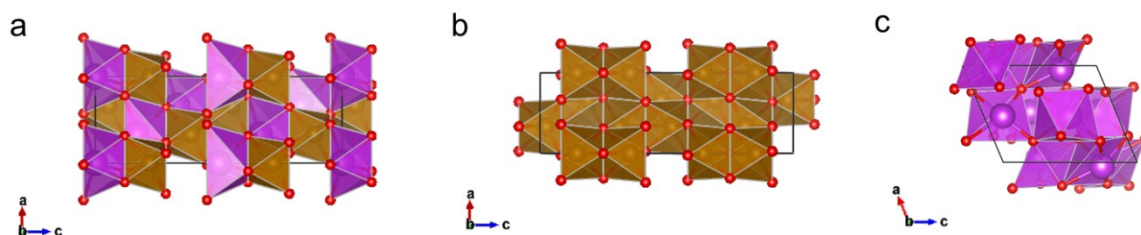

**Figure S1** (a) Trigonal FeBiO<sub>3</sub> structure with a space group of R<sub>3</sub>C. (b) Triclinic Fe<sub>2</sub>O<sub>3</sub> structure with a space group of R<sub>3</sub>C. (c) Monoclinic Bi<sub>2</sub>O<sub>3</sub> structure with a space group of P2<sub>1</sub>/C.

From an energetic point of view, the electrochemically driven bismuth evolution was considered according to the heat of enthalpy of the following reaction.

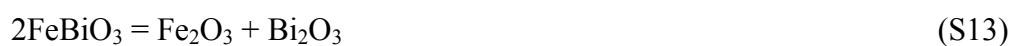

The heat of enthalpy is calculated by the following equation:

$$\Delta H = E_{\text{Fe}_2\text{O}_3} + E_{\text{Bi}_2\text{O}_3} - 2E_{\text{FeBiO}_3}, \quad (\text{S14})$$

where E is the calculated total energy per f.u.

The  $\Delta H = 285.378 \text{ kJ mol}^{-1}$  calculated by DFT is positive, showing that the bismuth evolution is a non-spontaneous process and the electrochemical process accounts for the evolution.

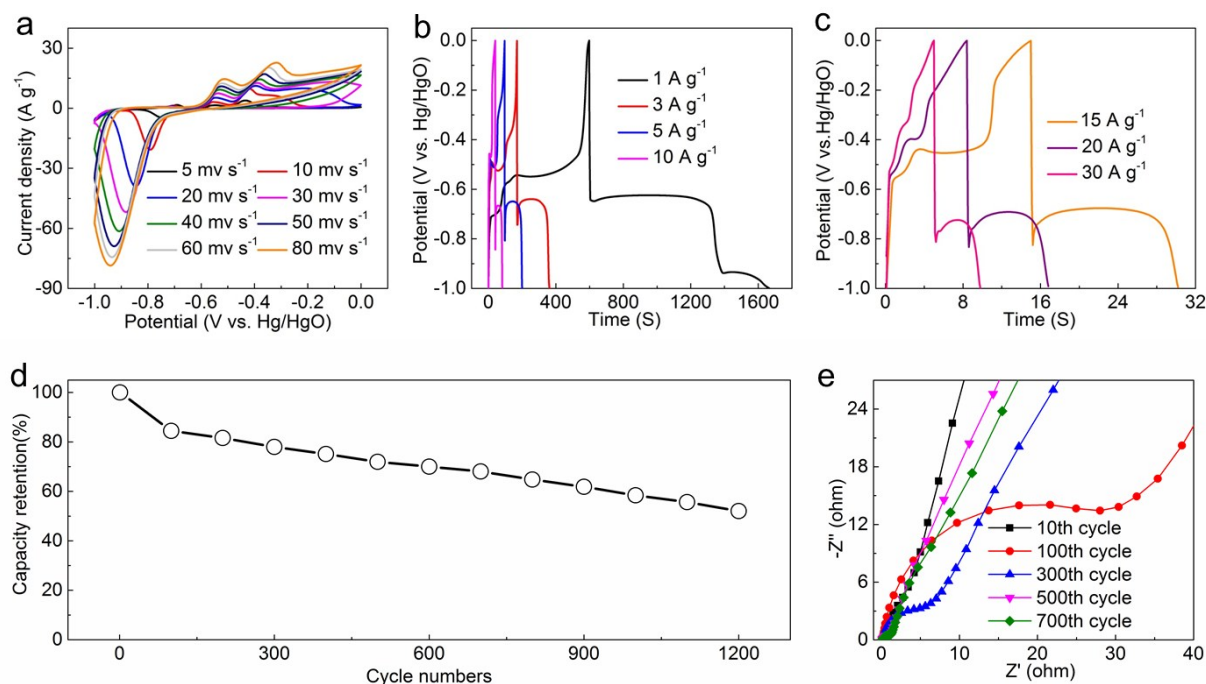

**Figure S2** Electrochemical properties of as-prepared BiFeO<sub>3</sub> samples in three electrode systems: CV (a) and GCD (b-c) plots at various scan rates and current densities. (d) Cycling performances at current density of 5 A g<sup>-1</sup>. (e) EIS curves of different cycle numbers.

To further investigate the electrochemical performance of BiFeO<sub>3</sub>, CV, GCD, and EIS experiments were performed on a three-electrode test system, as presented in Figure S2. The CV curves display two oxidizing peaks and a reducing peak. The larger scan rates, the more incremental peak current densities, which indicate the good correspondence between electron and ion in the electrochemical reaction process (Figure S2 a). The GCD curves were shown Figure S2 b-c. It can be noted that as the current density increases, the time of the charge and discharge process decreases. This phenomenon was attributed to the fact that the diffusion of hydroxide cannot keep up with rapid potential changes, resulting in a decrease in the contribution of redox reactions.<sup>3</sup> The electrode of BiFeO<sub>3</sub> capacitor retention was not well. This was attributed to the fact BiFeO<sub>3</sub> micro-particles become nanoparticle during the phase decomposition process and a small amount of particles dissolve in the electrolyte (Figure S2 d). Figure S2 e displays EIS curves of different cycle numbers.

It can be found that the radius of the semi-circular arc largest of 100<sup>th</sup> cycle, indicating that there is a large charge transfer resistance, which is due to the fact that the phase decomposition process produces more phase interfaces and increases the difficulty of charge transfer.<sup>4</sup>

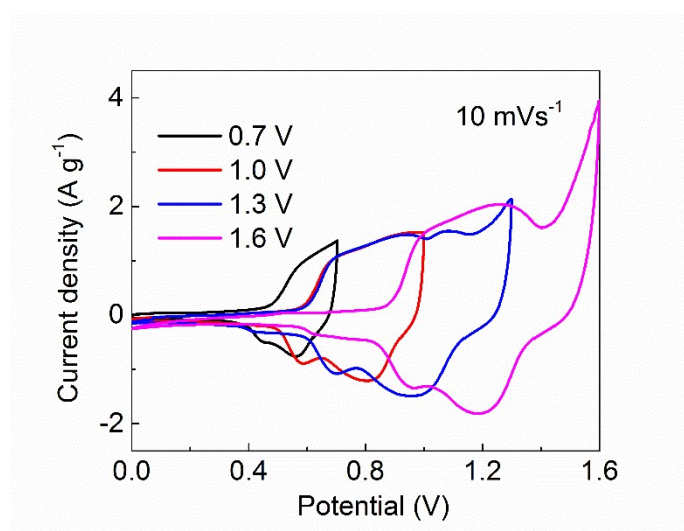

**Figure S3** CV plots of hybrid electrochemical energy storage device at various potential windows in 6mol L<sup>-1</sup> KOH aqueous solution at 10 mV s<sup>-1</sup> scan rate.

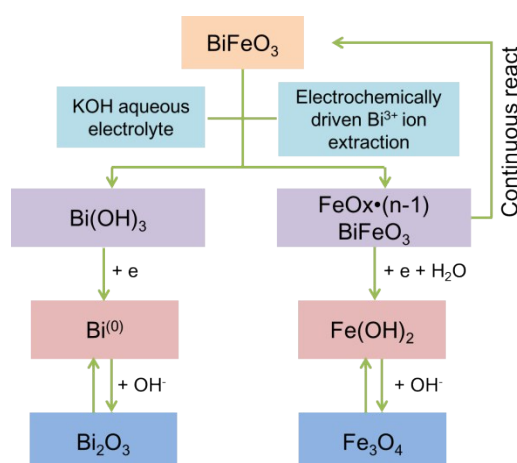

**Figure S4** Evolution process of bismuth ion extraction from A site in BFO material.

In the process of electrochemical action, the Bi-O coordination bond is easily broken due to the strong polarity of the hydroxide to form bismuth hydroxide with the alkali aqueous solution. Singh et al. reported that the relative Gibbs free energy (0.19 eV/atom) of BiFeO<sub>3</sub> in aqueous media (PH=8.0) at 1.5 V (vs. RHE), and their decomposition products were Fe<sub>2</sub>O<sub>3</sub> and Bi<sub>4</sub>O<sub>7</sub> by the first-principles-based formalism<sup>5</sup>. Therefore, Bi(OH)<sub>3</sub> and FeO<sub>x</sub> are further reduced. In the 6mol L<sup>-1</sup> KOH alkaline water electrolyte, Bi(OH)<sub>3</sub> and Fe(OH)<sub>2</sub> would react with OH<sup>-</sup> to form Bi<sub>2</sub>O<sub>3</sub> and Fe<sub>2</sub>O<sub>3</sub>, respectively. The remaining part of BiFeO<sub>3</sub> undergo the same reaction processes, as shown in Figure S4.

## Supplementary References

- [1] K. Ujimine and A. Tsutsumi, *J. Power Sources*, 2006, **160**, 1431-1435.
- [2] B. T. Hang, T. Watanabe, M. Eashira, S. Okada, J.-i. Yamaki, S. Hata, S.-H. Yoon and I. Mochida, *J. Power Sources*, 2005, **150**, 261-271.
- [3] J. Xu, C. Ma, J. Cao and Z. Chen, *Dalton Trans.*, 2017, **46**, 3276 -3283.
- [4] Y. Shao, M. F. El-Kady, C.-W. Lin, G. Zhu, K. L. Marsh, J. Y. Hwang, Q. Zhang, Y. Li, H. Wang and R. B. Kaner, *Adv. Mater.*, 2016, **28**, 6719-6726.
- [5] A. K. Singh, L. Zhou, A. Shinde, S. K. Suram, J. H. Montoya, D. Winston, J. M. Gregoire and K. A. Persson, *Chem. Mater.*, 2017, **29**, 10159-10167.
